# Supplementary material for: Sustainable hydropower in the 21st century
Source: PubMed Central journal article supplement — Proc Natl Acad Sci U S A. 2018 Nov 5;115(47):11891–8. doi: 10.1073/pnas.1809426115 (PMC6255148; doi:10.1073/pnas.1809426115), 2018-11-05
Supplement: pnas.1809426115.sapp.pdf [file pnas.1809426115.sapp.pdf]

| River Basin | discharge (m <sup>3</sup> /s) | peak discharge (m <sup>3</sup> /s) | Area (x 1000 km <sup>2</sup> ) | Protected area (km <sup>2</sup> ) | Population               | fish catch (tonnes/y) | agricultural area (km <sup>2</sup> ) | potential hydro-power (MW) | installed hydro-power (MW)  | GDP 2010 (US\$ x10 <sup>9</sup> ) | UNDP HDI Index      |
|-------------|-------------------------------|------------------------------------|--------------------------------|-----------------------------------|--------------------------|-----------------------|--------------------------------------|----------------------------|-----------------------------|-----------------------------------|---------------------|
| Amazon      | 209 000 <sup>1</sup>          | 370 000 (1953) <sup>1</sup>        | 7 050 <sup>1</sup>             | 1,029,003 * (2010) <sup>4</sup>   | 28 M <sup>6</sup> (2010) | 450 000 <sup>9</sup>  | 700 000 <sup>12</sup>                | 74 205 <sup>15</sup>       | 16 097 (2016) <sup>15</sup> | 60 <sup>18</sup>                  | 0.59 <sup>21</sup>  |
| Congo       | 41 200 <sup>1</sup>           | 80 830 (1961) <sup>1</sup>         | 4 014 <sup>1</sup>             | 244,772 (2010) <sup>4</sup>       | 81 M <sup>7</sup> (2008) | 119 500 <sup>10</sup> | 2 850 <sup>13</sup>                  | 39 000 <sup>10</sup>       | 2 472 (2014) <sup>16</sup>  | 37 <sup>19</sup>                  | 0.43 <sup>22</sup>  |
| Mekong      | 14 500 <sup>2</sup>           | 31 400 (1966) <sup>1</sup>         | 795 <sup>3</sup>               | 262,621 (2014) <sup>5</sup>       | 60 M <sup>8</sup> (2008) | 4.4 M <sup>11</sup>   | 1 000 <sup>14</sup>                  | 30 000 <sup>3</sup>        | 6 400 (2016) <sup>17</sup>  | 17 <sup>20</sup>                  | <0.65 <sup>23</sup> |

Table S1. Comparative statistics for the Amazon, Congo, and Mekong basins.

\* 47% of the Amazon is protected if one considers indigenous lands.

1. Large Rivers: Geomorphology and Management (2008). Avijit Gupta, editor. John Wiley & Sons. ISBN 0470723718, 9780470723715
2. Mekong River Commission. <http://portal.mrcmekong.org/mrctoolbox>
3. [http://www.fao.org/nr/water/aquastat/basins/mekong/mekong-CP\\_eng.pdf](http://www.fao.org/nr/water/aquastat/basins/mekong/mekong-CP_eng.pdf)
4. Joppa LN, Loarie SR, & Pimm SL (2008). On the protection of “protected areas”. *Proceedings of the National Academy of Sciences*, 105(18), 6673-6678.
5. WDPA 2014 (2014). [https://harvestchoice.org/data/wdpa14\\_clas\\_ia](https://harvestchoice.org/data/wdpa14_clas_ia)
6. Instituto Brasileiro de Geografia e Estatística (IBGE) (2010). Censos demograficos. WWW Document <http://censo2010.ibge.gov.br/> Accessed Sept 2018.
7. Oak Ridge National Laboratory (2008). LANDSCAN 2007 Global Population Dataset. Available at <http://www.ornl.gov/sci/landscan> and [http://gis.nacse.org/tfdd/map/result.php?bcode=CNGO&bcode=CNGO\\_ZAR&maptype=Population](http://gis.nacse.org/tfdd/map/result.php?bcode=CNGO&bcode=CNGO_ZAR&maptype=Population)
8. Cambodia’s Development Policy Research Institute, 2008. Framing research on water resources management and governance in Cambodia: a literature review. Working paper 37. (Available at: <http://www.cdri.org.kh/webdata/download/wp/wp37e.pdf>)

9. McIntyre PB, Liermann CAR, & Revenga C. (2016). Linking freshwater fishery management to global food security and biodiversity conservation. *Proceedings of the National Academy of Sciences*, 113(45), 12880-12885.
10. Harrison I.J., Brummett R., Stiasny M.L.J. (2016) Congo River Basin. In: Finlayson C., Milton G., Prentice R., Davidson N. (eds) *The Wetland Book*. Springer, Dordrecht. ([https://link.springer.com/content/pdf/10.1007/978-94-007-6173-5\\_92-2.pdf](https://link.springer.com/content/pdf/10.1007/978-94-007-6173-5_92-2.pdf))
11. <http://www.mrcmekong.org/news-and-events/newsletters/catch-and-culture-vol-21-no-3/>
12. based on deforestation estimates: <https://globalforestatlas.yale.edu/region/amazon>
13. Mayaux P, Pekel JF, Desclée B, Donnay F, Lupi A, Achard F, ... & Belward A. (2013). State and evolution of the African rainforests between 1990 and 2010. *Phil. Trans. R. Soc. B*, 368(1625), 20120300.
14. <http://www.mrcmekong.org/assets/Uploads/mekong-river-in-the-economy-final.pdf>
15. Anderson EP, Jenkins CN, Heilpern S, Maldonado-Ocampo JA, Carvajal-Vallejos FM, Encalada AC, ... & Salcedo, N. (2018). Fragmentation of Andes-to-Amazon connectivity by hydropower dams. *Science advances*, 4(1), eaao1642.
16. <https://www.hydropower.org/country-profiles/democratic-republic-of-the-congo>
17. [https://www.mrcsummit.org/assets/documents/Press-Docs/307051ba09/Fast-facts-and-figures-about-the-Mekong-River\\_EN.PDF](https://www.mrcsummit.org/assets/documents/Press-Docs/307051ba09/Fast-facts-and-figures-about-the-Mekong-River_EN.PDF)
18. Nobre, C. A., Sampaio, G., Borma, L. S., Castilla-Rubio, J. C., Silva, J. S., & Cardoso, M. (2016). Land-use and climate change risks in the Amazon and the need of a novel sustainable development paradigm. *Proceedings of the National Academy of Sciences*, 113(39), 10759-10768.
19. <https://tradingeconomics.com/congo/gdp>
20. Catch and Culture: A publication from the MRC Volume 21, No 3 (2015) (ISSN 0859-290X)
21. Caviglia-Harris, J., Sills, E., Bell, A., Harris, D., Mullan, K., & Roberts, D. (2016). Busting the boom–bust pattern of development in the Brazilian Amazon. *World Development*, 79, 82-96. (<https://www.sciencedirect.com/science/article/pii/S0305750X15002697>)
22. DRC only: values are highly variable. <http://hdr.undp.org/en/countries/profiles/COD>
23. High spatial variability: for more details, see: Veilleux, J. C. (2014). Is dam development a mechanism for human security? Scale and perception of the Grand Ethiopian Renaissance Dam on the Blue Nile River in Ethiopia and the Xayaburi Dam on the Mekong River in Laos.
